# Supplementary material
Source: PubMed Central journal article supplement (PMC2788852)
Supplement: supp_M109.037234_jbc.M109.037234-1.pdf [file supp_M109.037234_jbc.M109.037234-1.pdf]

A *P. syringae* (*avrRpt2*)

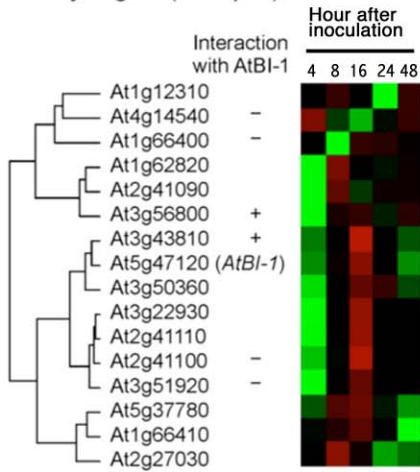

B Abiotic stresses

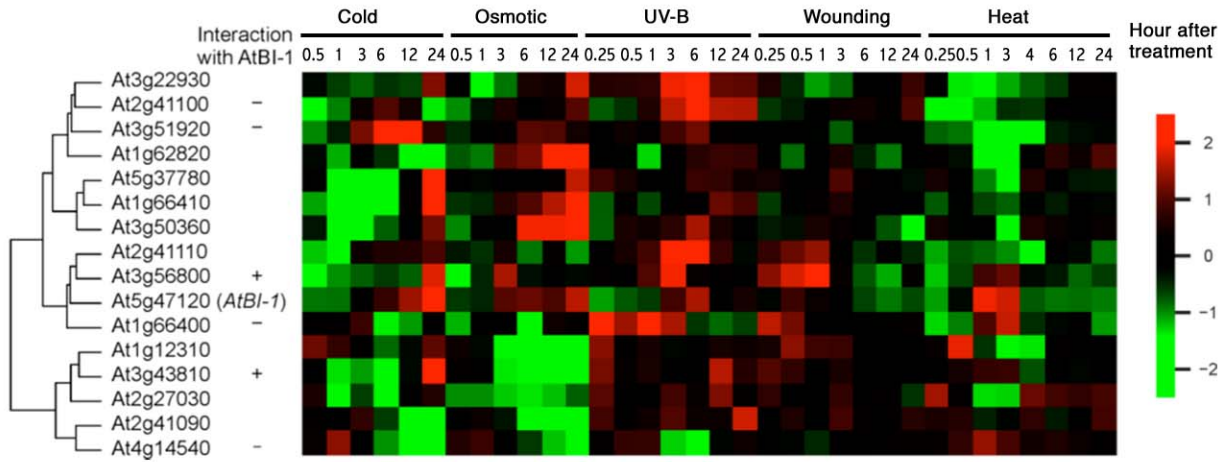

Figure S1.  
Kawai-Yamada et al

## Supporting Information

Figure S1. Hierarchical clustering of *AtBI-1* and calmodulin (CAM) /calmodulin-like proteins (CML) according to expression patterns during avirulent *P. syringae* (*avrRpt2*) infection (A) and various abiotic stresses (cold, osmotic, UV-B, wounding and heat stresses) (B). Expression data obtained from the Arabidopsis Electronic Fluorescent Pictograph (eFP) browser (28) were normalized and subjected to hierarchical cluster analysis and dendrogram generation using the algorithms embedded in the R software package. Heat map shows the normalized values with the color scale.
